# Supplementary material for: Efficacy of Total En Bloc Spondylectomy versus Stereotactic Ablative Radiotherapy for Single Spinal Metastasis
Source: MDPI journal article supplement (doi:10.3390/cancers15235518), 2023-11-22
Supplement: s1 [file s1]

**File S2.** Cox regression analyses about local progression for all patients treated with SABR.

|                                                  | Univariate analysis    |         | Multivariate analysis          |                  |
|--------------------------------------------------|------------------------|---------|--------------------------------|------------------|
|                                                  | Hazard ratio (95% CI)  | P value | Hazard ratio (95% CI)          | P value          |
| Age (years)                                      |                        | 0.352   |                                |                  |
| Sex (male)                                       | 2.238 (0.971-5.157)    | 0.059   |                                | 0.096            |
| ASA                                              |                        | 0.213   |                                |                  |
| ECOG $\geq$ 2                                    | 2.768 (0.793-9.665)    | 0.110   |                                |                  |
| Primary cancer group of modified Tokuhashi score |                        | 0.001   |                                | <b>&lt;0.001</b> |
| Kidney, uterus <sup>a</sup>                      | 3.381 (0.907-12.611)   | 0.070   |                                | 0.051            |
| Liver, gallbladder <sup>a</sup>                  | 12.994 (3.459-48.813)  | <0.001  | <b>90.548 (10.146-808.107)</b> | <b>&lt;0.001</b> |
| Lung, pancreas,etc <sup>a</sup>                  | 3.780 (1.078-13.251)   | 0.038   |                                | 0.051            |
| Extraspinal bone metastasis                      |                        | 0.045   |                                | <b>0.048</b>     |
| 1-2 <sup>b</sup>                                 |                        | 0.331   |                                | 0.968            |
| $\geq$ 3 <sup>b</sup>                            | 15.505 (1.668-144.133) | 0.016   | <b>81.440 (5.402-1227.676)</b> | <b>0.001</b>     |
| Internal organ metastasis                        |                        | 0.013   |                                | 0.268            |
| Removable <sup>c</sup>                           |                        | 0.352   |                                | 0.431            |
| Unremovable <sup>c</sup>                         | 2.801 (1.131-6.936)    | 0.026   |                                | 0.113            |
| Radioresistancy                                  | 1.915 (0.824-4.450)    | 0.131   | <b>65.106 (7.424-570.990)</b>  | <b>&lt;0.001</b> |
| Location of spinal metastasis                    |                        | 0.609   |                                |                  |
| Thoracic <sup>d</sup>                            |                        | 0.323   |                                |                  |
| Cervical <sup>d</sup>                            |                        | 0.780   |                                |                  |
| Prior radiotherapy                               | 4.381 (1.253-15.324)   | 0.021   |                                | 0.064            |
| Prior adjuvant Tx.                               |                        | 0.865   |                                |                  |
| Total radiation dose                             |                        | 0.227   |                                |                  |
| Fraction                                         |                        | 0.204   |                                |                  |
| High bilsky grade                                | 2.862 (1.207-6.788)    | 0.017   |                                | 0.305            |
| Bilsky grade 3                                   | 2.991 (1.148-7.793)    | 0.025   | <b>4.013 (1.191-13.473)</b>    | <b>0.025</b>     |
| Size > 30mm                                      |                        | 0.423   |                                |                  |
| Time from diagnosis to treatment (month)         |                        | 0.229   |                                |                  |

<sup>a</sup> Hazard ratio compared to primary cancer origin of thyroid, breast, prostate carcinoid tumour, <sup>b</sup> Hazard ratio compared to no extraspinal bone metastasis, <sup>c</sup> Hazard ratio compared to no internal organ metastasis, <sup>d</sup> Hazard ratio compared to lumbar.
