# Supplementary material for: Efficacy of Total En Bloc Spondylectomy versus Stereotactic Ablative Radiotherapy for Single Spinal Metastasis
Source: MDPI journal article supplement (doi:10.3390/cancers15235518), 2023-11-22
Supplement: s1 [file s1]

| File S1. Oncological data of the matched patients |                                       |                      |                       |                                                  |                                |                                                |                       |                         |                                         |                                         |        |  |
|---------------------------------------------------|---------------------------------------|----------------------|-----------------------|--------------------------------------------------|--------------------------------|------------------------------------------------|-----------------------|-------------------------|-----------------------------------------|-----------------------------------------|--------|--|
| Pair no./sex/<br>age (year)/<br>Tx.               | Entities                              | Affected<br>vertebra | Primary<br>tumor site | New<br>England<br>spinal<br>metastas<br>is score | Modified<br>Tokuhashi<br>score | Other metastases<br>site at the time of<br>Tx. | Follow<br>-up<br>(mo) | Local<br>recurren<br>ce | Time to<br>local<br>recurren<br>ce (mo) | Overall<br>survival<br>from Tx.<br>(mo) | Status |  |
| 1 / F / 27 /<br>TES                               | RCC                                   | L4                   | Right<br>kidney       | 4                                                | 13                             | None                                           | 54.4                  | No                      |                                         | 55.2                                    | DOD    |  |
| 1 / M / 84 /<br>SABR                              | RCC                                   | C3                   | Right<br>kidney       | 4                                                | 12                             | None                                           | 26.1                  | No                      |                                         | 44.3                                    | AWD    |  |
| 2 / M / 77 /<br>TES                               | RCC                                   | T11                  | Left<br>kidney        | 4                                                | 11                             | Clavicle                                       | 56.2                  | No                      |                                         | 57.6                                    | DOD    |  |
| 2 / M / 80 /<br>SABR                              | RCC                                   | T2                   | Left<br>kidney        | 4                                                | 10                             | Lung, mediastinal<br>Lymph node                | 21.7                  | No                      |                                         | 22.8                                    | DOD    |  |
| 3 / M / 61 /<br>TES                               | Thyroid<br>cancer                     | L1                   |                       | 4                                                | 14                             | Lung                                           | 97.7                  | No                      |                                         | 97.7                                    | NED    |  |
| 3 / F / 62 /7A<br>SABR                            | Thyroid<br>cancer                     | T12                  |                       | 4                                                | 15                             | None                                           | 69.0                  | Yes                     | 17.0                                    | 87.0                                    | AWD    |  |
| 4 / M / 64 /<br>TES                               | Poorly<br>differentiated<br>carcinoma | T3                   | T3                    | 4                                                | 9                              | None                                           | 26.3                  | No                      |                                         | 27.4                                    | DOD    |  |
| 4 / M /66 /<br>SABR                               | HCC                                   | L1                   |                       | 4                                                | 9                              | None                                           | 3.6                   | No                      |                                         | 6.7                                     | DOD    |  |
| 5 / M / 56 /<br>TES                               | HCC                                   | T7                   |                       | 2                                                | 7                              | Lung, ilium, rib                               | 9.6                   | No                      |                                         | 11.4                                    | DOD    |  |
| 5 / F / 67 /<br>SABR                              | HCC                                   | L3                   |                       | 2                                                | 7                              | Lung, ilium                                    | 39.8                  | No                      |                                         | 41.0                                    | DOD    |  |
| 6 / M / 71 /<br>TES                               | Thyroid<br>cancer                     | T9                   |                       | 4                                                | 15                             | None                                           | 95.4                  | No                      |                                         | 96.6                                    | DOD    |  |
| 6 / F / 58 /<br>SABR                              | Breast cancer                         | T11                  | Left<br>breast        | 4                                                | 15                             | None                                           | 89                    | No                      |                                         | 94.5                                    | AWD    |  |
| 7 / M / 69 /<br>TES                               | HCC                                   | L1                   |                       | 3                                                | 9                              | None                                           | 18.7                  | No                      |                                         | 19.4                                    | DOD    |  |
| 7 / M / 55 /<br>SABR                              | HCC                                   | C1                   |                       | 3                                                | 11                             | None                                           | 21.7                  | Yes                     | 8.9                                     | 22.2                                    | DOD    |  |

|                       |                                  |     |                 |   |    |                               |      |     |      |      |     |
|-----------------------|----------------------------------|-----|-----------------|---|----|-------------------------------|------|-----|------|------|-----|
| 8 / F / 48 /<br>TES   | Breast cancer                    | L2  | Left<br>breast  | 4 | 15 | None                          | 91.6 | No  |      | 93.3 | DOD |
| 8 / F / 50 /<br>SABR  | Breast cancer                    | T2  | Right<br>breast | 4 | 15 | None                          | 42.3 | No  |      | 47.2 | NED |
| 9 / M / 61 /<br>TES   | RCC                              | L2  | Left<br>kidney  | 3 | 10 | Lung                          | 20.2 | No  |      | 23.7 | DOD |
| 9 / M / 64 /<br>SABR  | RCC                              | L2  | Left<br>kidney  | 3 | 10 | Lung                          | 9.6  | Yes | 9.2  | 10.8 | DOD |
| 10 / M / 66 /<br>TES  | RCC                              | T9  | Left<br>kidney  | 4 | 11 | Pancreas                      | 31   | No  |      | 31.8 | DOD |
| 10 / M / 69 /<br>SABR | RCC                              | L4  | Right<br>kidney | 4 | 10 | Lung                          | 17.8 | No  |      | 18.5 | DOD |
| 11 / M / 52 /<br>TES  | HCC                              | T12 |                 | 4 | 11 | None                          | 25.8 | No  |      | 21.4 | DOD |
| 11 / M / 56 /<br>SABR | HCC                              | T9  |                 | 4 | 11 | None                          | 13.0 | Yes | 11.9 | 13.6 | DOD |
| 12 / F / 54 /<br>TES  | Breast cancer                    | T4  | Left<br>breast  | 4 | 14 | None                          | 97.7 | No  |      | 97.7 | NED |
| 12 / F / 53 /<br>SABR | Breast cancer                    | T7  | Left<br>breast  | 4 | 14 | LN                            | 51.4 | No  |      | 55.8 | NED |
| 13 / M / 56 /<br>TES  | Thyroid<br>cancer                | T8  |                 | 2 | 13 | Scapula, rib                  | 73.7 | No  |      | 86.8 | NED |
| 13 / M / 62 /<br>SABR | Thyroid<br>cancer                | T4  |                 | 2 | 12 | Lung                          | 14.5 | Yes | 9.9  | 16.2 | DOD |
| 14 / M / 38 /<br>TES  | RCC                              | T6  | Left<br>kidney  | 2 | 10 | Femur, adrenal,<br>Lymph node | 64.7 | No  |      | 66.7 | DOD |
| 14 / M / 78 /<br>SABR | RCC                              | L2  | Right<br>kidney | 2 | 10 | Lung, scapula, rib            | 27.1 | No  |      | 36.8 | AWD |
| 15 / M / 32 /<br>TES  | Adrenal<br>cortical<br>carcinoma | T11 |                 | 4 | 11 | None                          | 46.6 | No  |      | 47.5 | DOD |
| 15 / M / 59 /<br>SABR | HCC                              | T5  |                 | 4 | 11 | None                          | 16.5 | Yes | 1.4  | 16.5 | DOD |
| 16 / M / 51 /<br>TES  | RCC                              | T5  | Right<br>kidney | 4 | 11 | None                          | 97.7 | Yes | 44.6 | 97.7 | AWD |

|                       |                                       |    |                |   |    |      |      |     |      |      |     |
|-----------------------|---------------------------------------|----|----------------|---|----|------|------|-----|------|------|-----|
| 16 / M / 55 /<br>SABR | RCC                                   | T5 | Left<br>kidney | 4 | 11 | Lung | 34   | Yes | 12.6 | 40.1 | AWD |
| 17 / M / 53 /<br>TES  | Thyroid<br>cancer                     | T1 |                | 4 | 15 | None | 97.7 | Yes | 61.3 | 97.7 | AWD |
| 17 / F / 50 /<br>SABR | Breast cancer                         | L4 | Left<br>breast | 4 | 14 | None | 59.7 | No  |      | 64.2 | AWD |
| 18 / M / 33 /<br>TES  | Poorly<br>differentiated<br>carcinoma | L4 | L4             | 2 | 7  | Lung | 26.4 | Yes | 20.5 | 47.6 | DOD |
| 18 / M / 47 /<br>SABR | HCC                                   | L3 |                | 2 | 8  | Lung | 0.9  | No  |      | 2.5  | DOD |
| 19 / M / 53 /<br>TES  | NSCLC                                 | C7 |                | 2 | 10 | None | 13.5 | Yes | 6.2  | 13.8 | DOD |
| 19 / M / 60 /<br>SABR | NSCLC                                 | L3 |                | 2 | 10 | None | 79   | No  |      | 80.4 | DOD |
