# Supplementary material for: Efficacy of Total En Bloc Spondylectomy versus Stereotactic Ablative Radiotherapy for Single Spinal Metastasis
Source: MDPI journal article supplement (doi:10.3390/cancers15235518), 2023-11-22
Supplement: s1 [file s1]

| File S3. Adjuvant chemotherapy of the matched patients |                                    |                                                                                                                                  |                                                                                                           |
|--------------------------------------------------------|------------------------------------|----------------------------------------------------------------------------------------------------------------------------------|-----------------------------------------------------------------------------------------------------------|
| Pair no./sex/<br>age (year)/<br>Tx.                    | Primary cancer type                | Adjuvant chemotherapy agent<br>and cycles (#N)                                                                                   | Period                                                                                                    |
| 1 / F / 27 /<br>TES                                    | RCC                                | VAC/IE #5<br>Cytosan/Topotecan #4                                                                                                | -2001.11<br>2004.7-2004.10                                                                                |
| 1 / M / 84 /<br>SABR                                   | RCC                                | Pazopanib                                                                                                                        | 2019.2-2021.3                                                                                             |
| 2 / M / 77 /<br>TES                                    | RCC                                | None                                                                                                                             |                                                                                                           |
| 2 / M / 80 /<br>SABR                                   | RCC                                | None                                                                                                                             |                                                                                                           |
| 3 / M / 61 /<br>TES                                    | Thyroid cancer                     | RAI #12                                                                                                                          | -2010.8                                                                                                   |
| 3 / F / 62 /7A<br>SABR                                 | Thyroid cancer                     | RAI #7                                                                                                                           | 2007.6-2016.8                                                                                             |
| 4 / M / 64 /<br>TES                                    | Poorly differentiated<br>carcinoma | None                                                                                                                             |                                                                                                           |
| 4 / M / 66 /<br>SABR                                   | HCC                                | Sorafenib<br>Regorafenib<br>Nivolumab                                                                                            | 2018.12-2019.1<br>2019.1-2019.4<br>2019.5-2019.7                                                          |
| 5 / M / 56 /<br>TES                                    | HCC                                | Sorafenib                                                                                                                        | 2012.1-2012.3                                                                                             |
| 5 / F / 67 /<br>SABR                                   | HCC                                | Sorafenib<br>Regorafenib<br>PD1 + LAG3 #10<br>5-fluorouracil/Cis-platinum #5<br>Adriamycin #1                                    | 2017.7-2018.7<br>2018.10-2019.5<br>2019.9-2020.4<br>2020.4-2020.9<br>2020.9-11                            |
| 6 / M / 71 /<br>TES                                    | Thyroid cancer                     | RAI #5                                                                                                                           | -2013.11                                                                                                  |
| 6 / F / 58 /<br>SABR                                   | Breast cancer                      | Zoladex/Tamoxifen<br>Letrozole<br>Aromasin #24<br>Faslodex #21<br>Capecitabine #39<br>Paclitaxel #6<br>Gemcitabine/Cisplatin #13 | 2012.7<br>2012.7-2014.12<br>2014.12-2017.4<br>2017.5-2017.10<br>2019.1-2021.7<br>2021.8-2022.3<br>2022.3- |
| 7 / M / 69 /<br>TES                                    | HCC                                | Nexavar #6                                                                                                                       | -2012.6                                                                                                   |
| 7 / M / 55 /<br>SABR                                   | HCC                                | Sorafenib<br>Nivolumab                                                                                                           | 2019.5-2019.12<br>2020.2-2021.2                                                                           |
| 8 / F / 48 /<br>TES                                    | Breast cancer                      | Tamoxifen #10<br>Docetaxel #28                                                                                                   | -2016.3<br>-2018.9                                                                                        |
| 8 / F / 50 /<br>SABR                                   | Breast cancer                      | Tamoxifen<br>Letrozole<br>Xeloda #69                                                                                             | 2014.9-2018.4<br>2018.7-2018.12<br>2018.12-                                                               |
| 9 / M / 61 /<br>TES                                    | RCC                                | Sunitinib #5<br>Everolimus #11                                                                                                   | 2013.2-2013.9<br>2013.10-2014.8                                                                           |
| 9 / M / 64 /<br>SABR                                   | RCC                                | Bevacizumab<br>Sunitinib<br>Everolimus                                                                                           | 2015.8-2017.3<br>2017.4-2017.5<br>2017.5-2017.6                                                           |
| 10 / M / 66 /                                          | RCC                                | Sunitinib #20                                                                                                                    | 2011.1-2013.3                                                                                             |

|               |                                 |                                |                 |
|---------------|---------------------------------|--------------------------------|-----------------|
| TES           |                                 | RAD001 #3                      | 2013.6-2013.8   |
| 10 / M / 69 / | RCC                             | Sorafenib #3                   | 2013.9-2013.12  |
| SABR          |                                 | Pazopanib                      | 2017.1-2019.2   |
|               |                                 | Axitinib                       | 2019.2-2019.12  |
|               |                                 | Cabozantinib                   | 2019.12-2020.5  |
|               |                                 | Everolimus                     | 2020.5-2021.6   |
| 11 / M / 52 / | HCC                             | FOLFOX #2                      | 2013.11-2013.12 |
| TES           |                                 | Paclitaxel/Cisplatin #8        | 2014.1-2014.6   |
|               |                                 | FOLFIRI #6                     | 2014.7-2014.10  |
| 11 / M / 56 / | HCC                             | Sorafenib                      | 2019.1-2019.3   |
| SABR          |                                 | Regorafenib                    | 2019.3-2019.6   |
|               |                                 | Nivolumab                      | 2019.6-2019.9   |
| 12 / F / 54 / | Breast cancer                   | Adriamycin/Cyclophosphamide #4 |                 |
| TES           |                                 | Paclitaxel #4                  | -2014.4         |
|               |                                 | Xeloda #8                      | -2019.6         |
|               |                                 | Verzenio/Faslodex #25-27       | 2020.7-         |
| 12 / F / 53 / | Breast cancer                   | Docetaxel #8                   | 2017.6-2017.11  |
| SABR          |                                 |                                |                 |
| 13 / M / 56 / | Thyroid cancer                  | RAI #1                         | 2016.1          |
| TES           |                                 |                                |                 |
| 13 / M / 62 / | Thyroid cancer                  | RAI #1                         | 2015.1          |
| SABR          |                                 | Sorafenib                      | 2015.2-2016.3   |
|               |                                 | Lenvatinib                     | 2016.7-2019.10  |
|               |                                 | Adriamycin/Cisplatin           | 2019.12-2020.2  |
| 14 / M / 38 / | RCC                             | Sunitinib #16                  | -2017.12        |
| TES           |                                 | Atezolizumab/Cobimetinib       | 2017.12-2018.7  |
|               |                                 | Axitinib                       | 2018.7-2019.4   |
|               |                                 | Cabozantinib                   | 2019.5-2019.7   |
| 14 / M / 78 / | RCC                             | Pazopanib                      | 2019.3-2021.12  |
| SABR          |                                 |                                |                 |
| 15 / M / 32 / | Adrenal cortical carcinoma      | Mitotane                       | 2014.1-2014.7   |
| TES           |                                 | Doxorubicin/Cisplatin #6       | 2014.10-2015.1  |
| 15 / M / 59 / | HCC                             | Regorafenib                    | 2018.11-2019.1  |
| SABR          |                                 | Cabozantinib                   | 2019.12-2020.3  |
| 16 / M / 51 / | RCC                             | Sunitinib                      | 2014.3-2017.3   |
| TES           |                                 | Everolimus                     | 2017.3-2019.5   |
|               |                                 | Cabozantinib                   | 2021.12-2022.1  |
|               |                                 | Nivolumab #2                   | 2022.1-2022.2   |
| 16 / M / 55 / | RCC                             | Pazopanib                      | 2018.12-2018.1  |
| SABR          |                                 | Sunitinib                      | 2019.2-2020.11  |
|               |                                 | Axitinib                       | 2020.12-2021.9  |
|               |                                 | Cabozantinib                   | 2021.9-         |
| 17 / M / 53 / | Thyroid cancer                  | RAI #2                         | 2020.4-2021.1   |
| TES           |                                 |                                |                 |
| 17 / F / 50 / | Breast cancer                   | TCHP/Neulapeg #6               | 2016.6-9        |
| SABR          |                                 | Herceptin #8                   | 2016.11-2017.4  |
|               |                                 | TDM-1 #15                      | 2017.7-2018.7   |
|               |                                 | Eribulin/Trastuzumab #24       | 2018.9-2020.1   |
|               |                                 | Trastuzumab Deruxtecan #42     | 2020.3-         |
| 18 / M / 33 / | Poorly differentiated carcinoma | Docetaxel/Cyclophosphamide #4  | 2015.8-2015.10  |
| TES           |                                 |                                |                 |
| 18 / M / 47 / | HCC                             | Sorafenib                      | 2017.5-2018.9   |
| SABR          |                                 |                                |                 |

|                       |       |                           |                |
|-----------------------|-------|---------------------------|----------------|
| 19 / M / 53 /<br>TES  | NSCLC | Cisplatin/Vinorelbine #4  | 2011.11-2012.1 |
|                       |       | Gefitinib                 | 2012.9-2013.3  |
|                       |       | Cisplatin/Gemcitabine #2  | 2013.5-2013.6  |
|                       |       | Paclitaxel/Carboplatin #2 | 2013.6-2013.8  |
|                       |       | Pemetrexed #2             | 2013.8-2013.9  |
| 19 / M / 60 /<br>SABR | NSCLC | LXH254#2                  | 2019.1-2       |
